# Supplementary material
Source: Elsevier journal article supplement (https://www.sciencedirect.com/science/article/pii/S1885585723003444)
Supplement: mmc1 [file mmc1.pdf]

**SUPPLEMENTARY DATA**

**Table 1 of the supplementary data**

KAMIR-NIH participating sites and investigators

|    | Institution                                | Principle investigators |
|----|--------------------------------------------|-------------------------|
| 1  | Chonnam National University Hospital       | Myung Ho Jeong          |
| 2  | Gachon University Gil Medical Center       | Tae Hoon Ahn            |
| 3  | Seoul St. Mary's Hospital                  | Ki Bae Seung            |
| 4  | Korea University Guro Hospital             | Seung-Woon Rha          |
| 5  | Seoul National University Hospital         | Hyo-Soo Kim             |
| 6  | Seoul National University Bundang Hospital | Chang-Hwan Yoon         |
| 7  | Samsung Medical Center                     | Hyeon-Cheol Gwon        |
| 8  | Gangdong Kyunghee University Hospital      | Chong-Jin Kim           |
| 9  | Wonju Severance Christian Hospital         | Junghan Yoon            |
| 10 | Chungnam National University Hospital      | In-Whan Seong           |
| 11 | Chungbuk National University Hospital      | Kyung-Kuk Hwang         |
| 12 | Chonbuk National University Hospital       | Jei Keon Chae           |
| 13 | Wonkwang University Hospital               | Seok Kyu Oh             |
| 14 | Yeungnam University Medical Center         | Jung-Hee Lee            |
| 15 | Kyungpook National University Hospital     | Shung Chull Chae        |
| 16 | Keimyung University Dongsan Medical Center | Seung-Ho Hur            |
| 17 | Pusan Natinoal University Hospital         | Kwang Soo Cha           |
| 18 | Gyeongsang National University Hospital    | Jin-Yong Hwang          |

|    |                                        |               |
|----|----------------------------------------|---------------|
| 19 | Inje University Haeundae Paik Hospital | Doo-Il Kim    |
| 20 | Jeju National University Hospital      | Seung-Jae Joo |

**Table 2 of the supplementary data**

KAMIR-V participating sites and investigators

|    | Institution                                | Principle investigators |
|----|--------------------------------------------|-------------------------|
| 1  | Chonnam National University Hospital       | Myung Ho Jeong          |
| 2  | Seoul St. Mary's Hospital                  | KiYuk Chang             |
| 3  | Bucheon St. Mary's Hospital                | Hee-Yeol Kim            |
| 4  | St. Vincent Hospital                       | Ki-Dong Yoo             |
| 5  | Gangneung Asan Hospital                    | Sang-Yong Yoo           |
| 6  | Kyungpook National University Hospital     | Shung Chull Chae        |
| 7  | Gyeongsang National University Hospital    | Jin-Yong Hwang          |
| 8  | Kyunghee University Hospital               | Weon Kim                |
| 9  | Keimyung University Dongsan Medical Center | Seung Ho Hur            |
| 10 | Korea University Guro Hospital             | Seung-Woon Rha          |
| 11 | Dongguk University Gyeongju Hospital       | Deuk-Young Nah          |
| 12 | Gangdong Kyunghee University Hospital      | Chong-Jin Kim           |
| 13 | Pusan National University Hospital         | Kwang Soo Cha           |
| 14 | Seoul National University Bundang Hospital | Chang-Hwan Yoon         |
| 15 | Seoul National University Hospital         | Hyo-Soo Kim             |
| 16 | Samsung Medical Center                     | Hyeon-Cheol Gwon        |
| 17 | Suncheon St. Garolo Hospital               | Jang Hyun Cho           |
| 18 | Yeungnam University Hospital               | Jong-Seon Park          |
| 19 | Wonkwang University Hospital               | Seok Kyu Oh             |
| 20 | Wonju Severance Christian Hospital         | Junghan Yoon            |

|    |                                           |                 |
|----|-------------------------------------------|-----------------|
| 21 | Daejeon Eulji University Hospital         | Kyu-Sun Lee     |
| 22 | Chonbuk National University Hospital      | Jei Keon Chae   |
| 23 | Prebyterian Medical Center                | Jay-Young Rhew  |
| 24 | Jeju National University Hospital         | Seung-Jae Joo   |
| 25 | Cheongju St. Mary's Hospital              | Yong-Mo Yang    |
| 26 | Chungnam National University Hospital     | In-Whan Seong   |
| 27 | Chungbuk National University Hospital     | Kyung-Kuk Hwang |
| 28 | Seoul Boramae Hospital                    | Sang-Hyun Kim   |
| 29 | Inje University Haeundae Paik Hospital    | Doo-Il Kim      |
| 30 | Samsung Changwon Hospital                 | Yong Hwan Park  |
| 31 | Inje University Ilsan Paik Hospital       | Sung Uk Kwon    |
| 32 | Gachon University Gil Medical Center      | Tae Hoon Ahn    |
| 33 | St. Paul's Hospital                       | Dong-Bin Kim    |
| 34 | Kangwon National University Hospital      | Byung Ryul Cho  |
| 35 | Kwangju Christian Hospital                | Seung-Uk Lee    |
| 36 | Konyang University Hospital               | Jang Ho Bae     |
| 37 | Korea University Ansan Hospital           | Sang Yup Lim    |
| 38 | Daegu Catholic University Medical Center  | Kee Sik Kim     |
| 39 | Dong-A University Hospital                | Moo Hyun Kim    |
| 40 | Soonchunhyang University Cheonan Hospital | Sang-Ho Park    |
| 41 | Ajou University Hospital                  | Seung Je Tak    |
| 42 | Inha University Hospital                  | Sung-Il Woo     |
| 43 | Inje University Sanggye Paik Hospital     | Byung Ok Kim    |

**Table 3 of the supplementary data**

Medication use

|                                   | At discharge            |                           | After 1 year            |                           |
|-----------------------------------|-------------------------|---------------------------|-------------------------|---------------------------|
|                                   | OCT-guided<br>(n = 535) | IVUS-guided<br>(n = 4725) | OCT-guided<br>(n = 535) | IVUS-guided<br>(n = 4725) |
| <b>DAPT</b>                       | 527 (98.5)              | 4633 (98.1)               | 418 (78.1)              | 3732 (79.0)               |
| <b>Antiplatelet agent</b>         |                         |                           |                         |                           |
| <i>Aspirin</i>                    | 531 (99.3)              | 4659 (98.6)               | 477 (89.2)              | 4068 (86.1)               |
| <i>P2Y<sub>12</sub> inhibitor</i> | 531 (99.3)              | 4671 (98.9)               | 440 (82.2)              | 3926 (83.1)               |
| Clopidogrel                       | 238 (44.5)              | 2290 (48.5)               | 253 (47.3)              | 2124 (45.0)               |
| Ticagrelor                        | 218 (40.7)              | 1,999 (42.3)              | 138 (25.8)              | 1,530 (32.4)              |
| Prasugrel                         | 75 (14.0)               | 382 (8.1)                 | 54 (10.1)               | 327 (6.9)                 |
| <b>Anticoagulant agent</b>        | 12 (2.2)                | 129 (2.7)                 | 14 (2.6)                | 104 (2.2)                 |
| <b>Triple therapy</b>             | 12 (2.2)                | 117 (2.5)                 | 10 (1.9)                | 76 (1.6)                  |
| <b>Beta-blocker</b>               | 457 (85.4)              | 3776 (79.9)               | 409 (76.4)              | 3347 (70.8)               |
| <b>RAS inhibitor</b>              | 401 (75.0)              | 3545 (75.0)               | 364 (68.0)              | 3142 (66.5)               |
| <b>Statin</b>                     | 519 (97.0)              | 4552 (96.3)               | 469 (87.7)              | 3954 (83.7)               |

DAPT, dual antiplatelet therapy; IVUS, intravascular ultrasound; OCT, optical coherence tomography;

RAS, renin-angiotensin system.

Data are presented as No. (%).

**Table 4 of the supplementary data**

Incidence of acute kidney injury according to renal function

| eGFR, mL/min/1.73m <sup>2</sup> | OCT-guided PCI<br>(n = 532) | IVUS-guided PCI<br>(n = 4715) |
|---------------------------------|-----------------------------|-------------------------------|
| ≥ 90                            | 0/478                       | 5/3817                        |
| 60-89                           | 0/38                        | 3/519                         |
| 45-59                           | 0/8                         | 6/198                         |
| 30- 44                          | 0/3                         | 7/86                          |
| ≤ 15                            | 0/5                         | 5/95                          |

eGFR, estimated glomerular filtration rate; IVUS, intravascular ultrasound; OCT, optical coherence tomography; PCI, percutaneous coronary intervention.

**Figure 1 of the supplementary data.**

Propensity score distribution

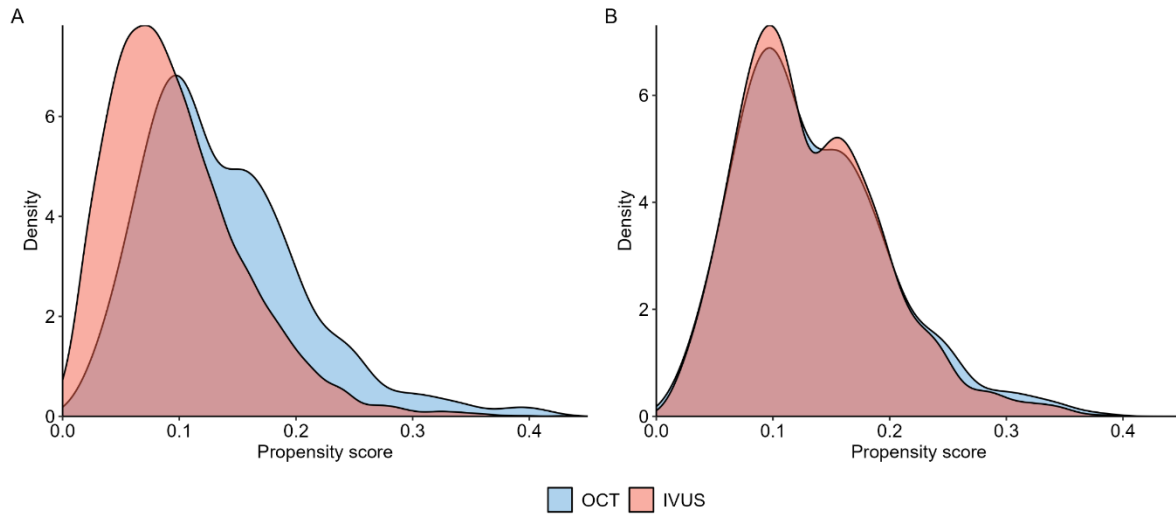

IVUS, intravascular ultrasound; OCT, optical coherence tomography.

**Figure 2 of the supplementary data**

Kaplan-Meier curves for 1-year all-cause death, all MI, and any revascularization

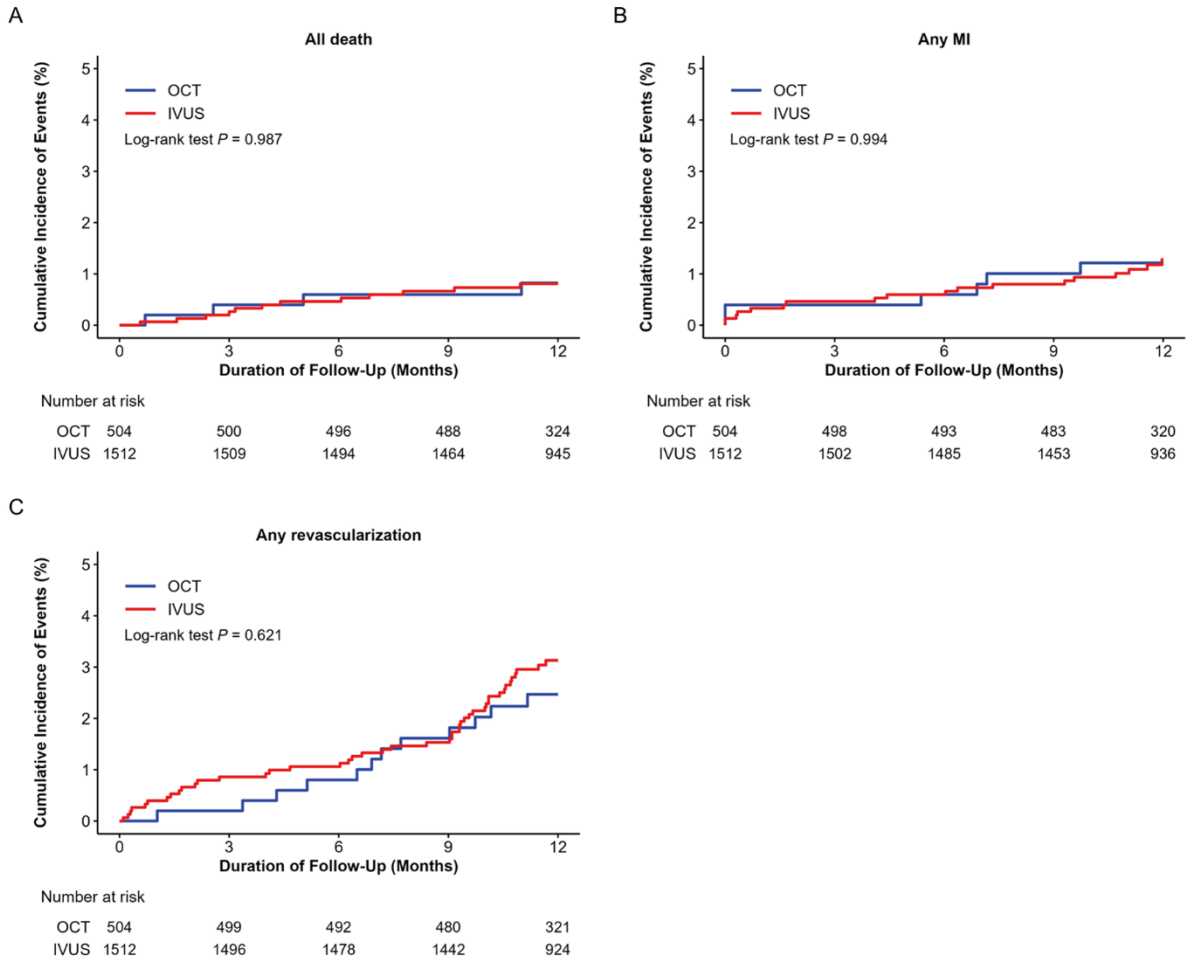

All-cause death (A), Any MI (B), Any revascularization (C)

IVUS, intravascular ultrasound; MI, myocardial infarction; OCT, optical coherence tomography.



Figure 3 of the supplementary data

Subgroup analysis for 1-year target lesion failure.

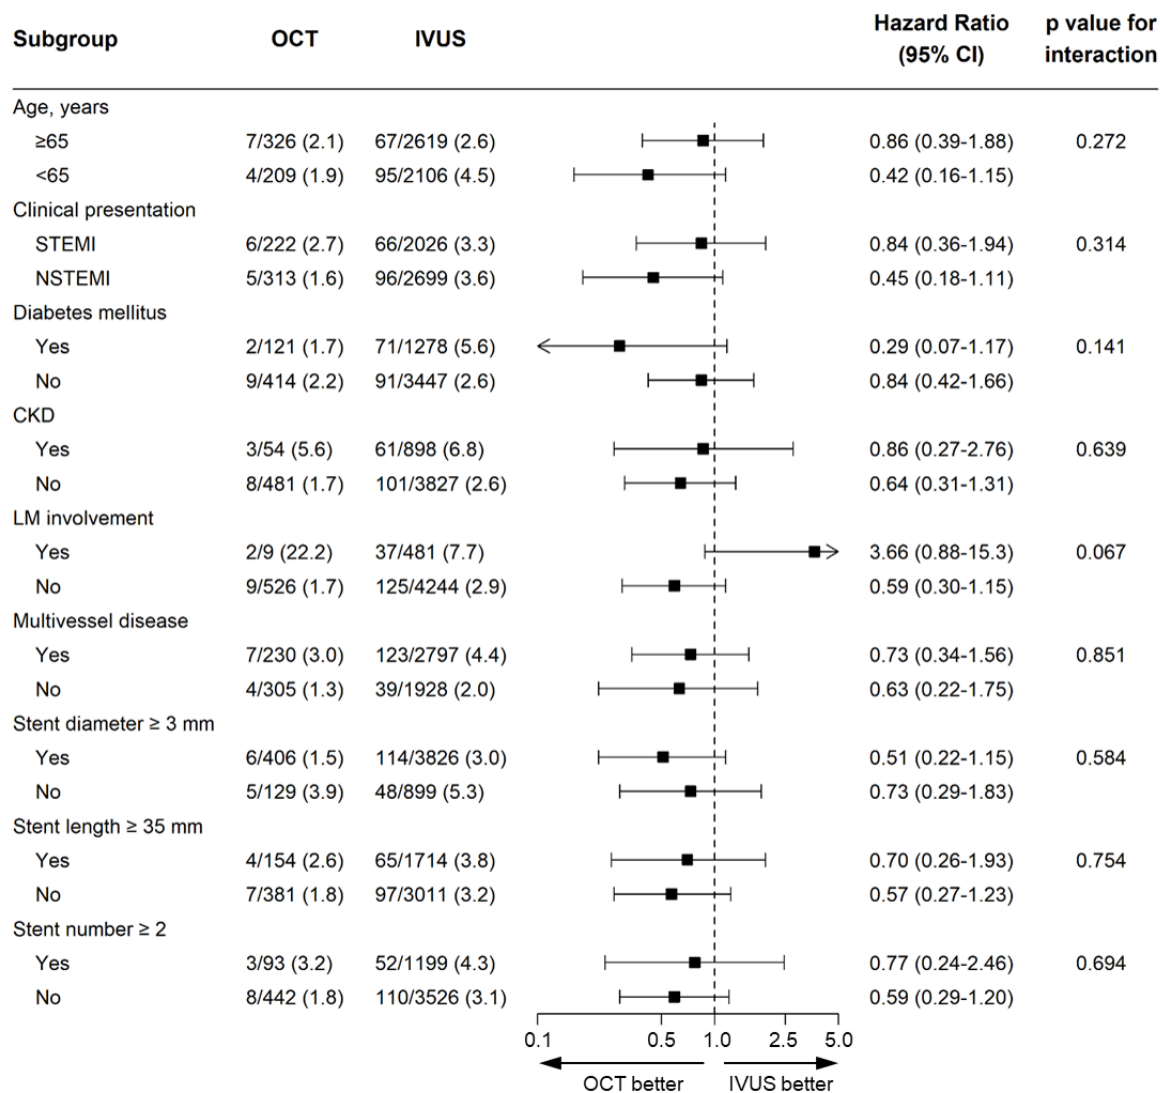

CKD, chronic kidney disease; IVUS, intravascular ultrasound; LM, left main artery; NSTEMI, non-ST-segment elevation myocardial infarction; OCT, optical coherence tomography; STEMI, ST-segment elevation myocardial infarction.
